# Supplementary material for: Synthesis of poly(caprolactone)-block-poly[oligo(ethylene glycol)methyl methacrylate] amphiphilic grafted nanoparticles (AGNs) as improved oil dispersants
Source: Royal Society of Chemistry journal article supplement (doi:10.1039/d1py00418b), 2021-01-01
Supplement: d1py00418b1.pdf [file d1py00418b1.pdf]

## SUPPORTING INFORMATION

### Synthesis of poly(caprolactone)-*block*-poly[oligo (ethylene glycol) methyl methacrylate] amphiphilic grafted nanoparticles (AGNs) as improved oil dispersants

Christopher B. Keller\*<sup>a</sup>, Susan E. Walley<sup>d</sup>, Curtis W. Jarand<sup>b</sup>, Jibao He<sup>c</sup>, Muhammad Ejaz<sup>a</sup>, Daniel A. Savin<sup>d</sup>, and Scott M. Grayson<sup>a</sup>

<sup>a</sup>Department of Chemistry, Percival Stern Hall, Tulane University, New Orleans, Louisiana, 70118

<sup>b</sup>Department of Physics and Engineering Physics, Percival Stern Hall, Tulane University, New Orleans, Louisiana, 70118

<sup>c</sup>Coordinated Instrument Facility, Percival Stern Hall, Tulane University, New Orleans, Louisiana, 70118

<sup>d</sup>Department of Chemistry, Leigh Hall, University of Florida, Gainesville, Florida 32611

Correspondence to: S. M. Grayson (E-mail: [sgrayson@tulane.edu](mailto:sgrayson@tulane.edu))

#### Table of contents

|               |            |      |              |          |      |        |       |                                   |
|---------------|------------|------|--------------|----------|------|--------|-------|-----------------------------------|
| <b>Figure</b> | <b>S1:</b> | Room | temperature  | TEM      |      |        |       |                                   |
| images.....   |            |      |              | <b>3</b> |      |        |       |                                   |
| <b>Figure</b> | <b>S2:</b> | TGA  | measurements | taken    | from | Figure | 4(a), | SiO <sub>2</sub> -                |
| OH.....       |            |      |              |          |      |        |       | <b>4</b>                          |
| <b>Figure</b> | <b>S3:</b> | TGA  | measurements | taken    | from | Figure | 4(b), | SiO <sub>2</sub> -GPS-            |
| OH.....       |            |      |              |          |      |        |       | <b>4</b>                          |
| <b>Figure</b> | <b>S4:</b> | TGA  | measurements | taken    | from | Figure | 4(c), | SiO <sub>2</sub> -GPS-PCL-        |
| OH.....       |            |      |              |          |      |        |       | <b>5</b>                          |
| <b>Figure</b> | <b>S5:</b> | TGA  | measurements | taken    | from | Figure | 4(d), | SiO <sub>2</sub> -GPS-PCL-        |
| Br.....       |            |      |              |          |      |        |       | <b>5</b>                          |
| <b>Figure</b> | <b>S6:</b> | TGA  | measurements | taken    | from | Figure | 4(e), | SiO <sub>2</sub> -GPS-PCL-POEGMA- |
| Br.....       |            |      |              |          |      |        |       | <b>6</b>                          |

|                    |                                                                                                                            |           |
|--------------------|----------------------------------------------------------------------------------------------------------------------------|-----------|
| <b>Figure S7:</b>  | TGA measurements taken from Figure 4(f), SiO <sub>2</sub> -GPS-PCL-POEGMA-Br after 4 redispersion cycles.....              | <b>6</b>  |
| <b>Figure S8:</b>  | TGA measurements of un-grafted PCL and un-grafted POEGMA.....                                                              | <b>7</b>  |
| <b>Figure S9:</b>  | TGA measurements of un-grafted PCL.....                                                                                    | <b>7</b>  |
| <b>Figure S10:</b> | TGA measurements of un-grafted POEGMA.....                                                                                 | <b>8</b>  |
| <b>Table S1:</b>   | Decomposition temperatures assignments, measured from TGA first derivative plots.....                                      | <b>8</b>  |
| <b>Figure S11:</b> | <sup>1</sup> H NMR spectrum of ε-caprolactone monomer with labeled peaks.....                                              | <b>9</b>  |
| <b>Figure S12:</b> | <sup>13</sup> C NMR spectrum of ε-caprolactone monomer with peaks.....                                                     | <b>9</b>  |
| <b>Figure S13:</b> | <sup>1</sup> H NMR spectrum of water-initiated un-grafted PCL (sample 2A and 2C) generated in situ with labeled peaks..... | <b>10</b> |
| <b>Figure S14:</b> | <sup>1</sup> H NMR spectrum of water-initiated un-grafted PCL (sample 2B) generated in situ with labeled peaks.....        | <b>10</b> |
| <b>Figure S15:</b> | <sup>1</sup> H NMR spectrum of water-initiated un-grafted PCL (sample 2D) generated in situ with labeled peaks.....        | <b>11</b> |
| <b>Figure S16:</b> | <sup>13</sup> C NMR spectrum of water-initiated un-grafted PCL (sample 2A) generated in situ with labeled peaks.....       | <b>11</b> |
| <b>Figure S17:</b> | <sup>1</sup> H NMR spectrum of ethyl 2-bromoisobutyrate (EBiB) with labeled peaks.....                                     | <b>12</b> |
| <b>Figure S18:</b> | <sup>13</sup> C NMR spectrum of ethyl 2-bromoisobutyrate (EBiB) with labeled peaks.....                                    | <b>12</b> |
| <b>Figure S19:</b> | <sup>1</sup> H NMR spectrum of oligo(ethylene glycol) mono-methyl ether methacrylate (OEGMA) with labeled peaks.....       | <b>13</b> |
| <b>Figure S20:</b> | <sup>13</sup> C NMR spectrum of oligo(ethylene glycol) mono-methyl ether methacrylate (OEGMA) with labeled peaks.....      | <b>13</b> |

**Figure S21:** <sup>1</sup>H NMR spectrum of EBiB-initiated, un-grafted POEGMA (sample 4A) generated in situ with labelled peaks.....14

**Figure S22:** <sup>1</sup>H NMR spectrum of EBiB-initiated, un-grafted POEGMA (sample 4B) generated in situ with labelled peaks.....14

**Figure S23:** <sup>1</sup>H NMR spectrum of EBiB-initiated, un-grafted POEGMA (sample 4C) generated in situ with labelled peaks.....15

**Figure S24:** <sup>1</sup>H NMR spectrum of EBiB-initiated, un-grafted POEGMA (sample 4D) generated in situ with labelled peaks.....15

**Figure S25:** <sup>1</sup>H NMR spectrum of EBiB-initiated, un-grafted POEGMA (sample 6) generated in situ with labelled peaks.....16

**Figure S26:** <sup>13</sup>C NMR spectrum of EBiB-initiated, un-grafted POEGMA generated in situ with labelled peaks.....16

**Figure S27:** TGA measurements of SiO<sub>2</sub>-GPS-PCL-POEGMA-Br NPs (Samples 4a-d) alongside SiO<sub>2</sub>-GPS-POEGMA-Br NPs (Sample 6) .....17

**Figure S28:** TGA measurements of SiO<sub>2</sub>-GPS-PCL-POEGMA-Br NPs (Sample 4a).....17

**Figure S29:** TGA measurements of SiO<sub>2</sub>-GPS-PCL-POEGMA-Br NPs (Sample 4b) .....18

**Figure S30:** TGA measurements of SiO<sub>2</sub>-GPS-PCL-POEGMA-Br NPs (Sample 4c).....18

**Figure S31:** TGA measurements of SiO<sub>2</sub>-GPS-PCL-POEGMA-Br NPs (Sample 4d).....19

**Figure S32:** TGA measurements of SiO<sub>2</sub>-GPS-POGEMA-Br NPs (Sample 6).....19

**Figure S33:** Sample 4a without oil exposure and after 24 hr of oil exposure compared the Anadarko crude oil reference.....20

**Figure S34:** Sample 4a without oil exposure, after 24 hr, and 96 hr of oil exposure compared the Anadarko crude oil reference.....20

**Figure S35:** Sample 4b exposed to BP crude oil for 72 hr.....**21**

**Figure S36:** Sample 4c exposed to BP crude oil for 72 hr.....**21**

**Figure S37:** Sample 4d exposed to BP crude oil for 72 hr.....**22**

**Figure S38:** Sample 6 exposed to BP crude oil for 72 hr.....**22**

**Figure S39:** A plot of surface tension vs. the natural log of concentration for SiO<sub>2</sub>-GPS-PCL-POEGMA-Br nanoparticles.....**23**

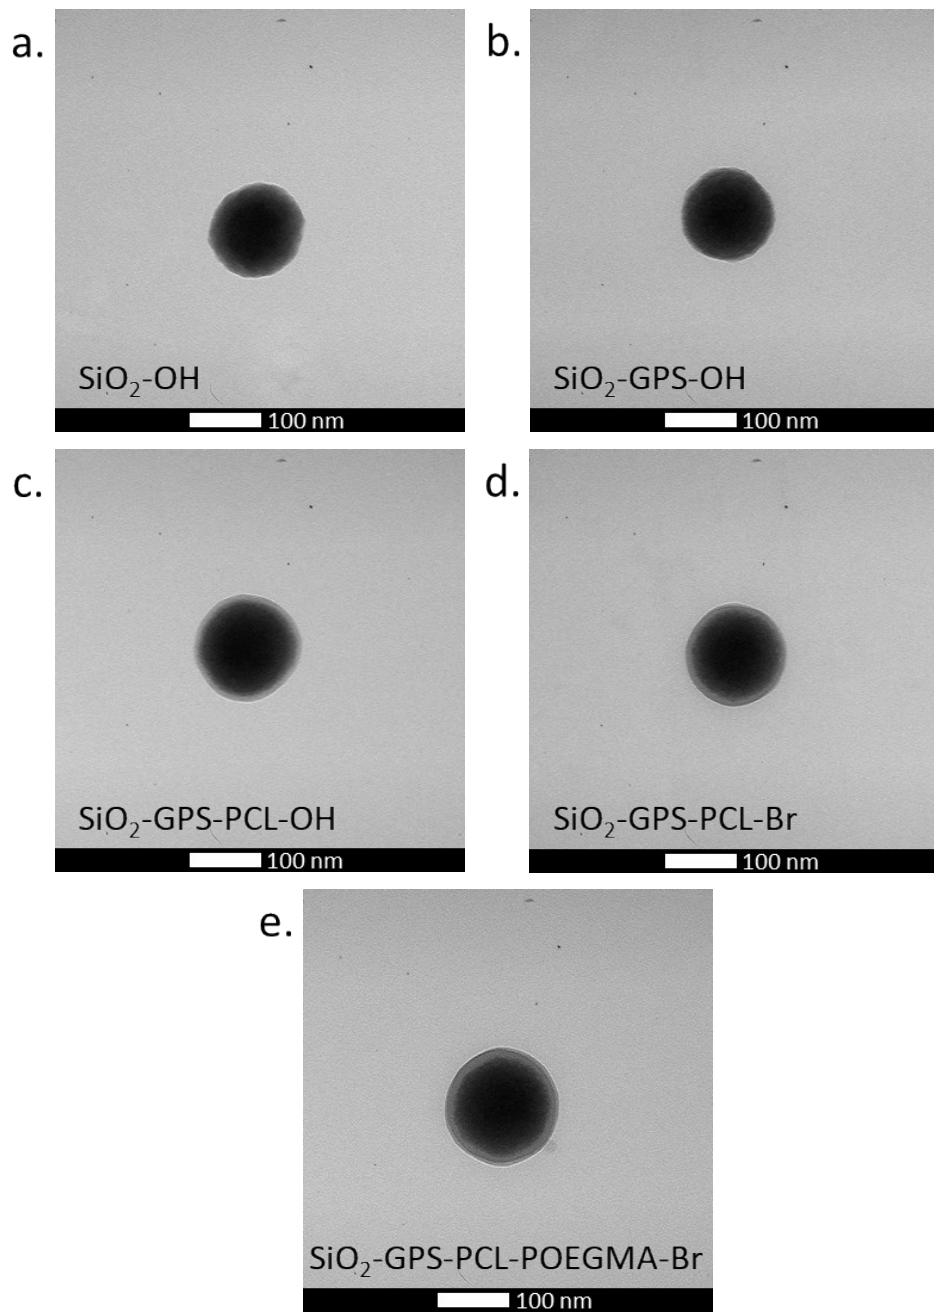

## Results

Figure S1: Room temperature TEM images from Figure 3: A)  $\text{SiO}_2\text{-OH}$ , B)  $\text{SiO}_2\text{-GPS-OH}$  (1), C)  $\text{SiO}_2\text{-GPS-PCL-OH}$  (2a), D)  $\text{SiO}_2\text{-GPS-PCL-Br}$  (3a), E)  $\text{SiO}_2\text{-GPS-PCL-POEGMA-Br}$  NPs (4a)

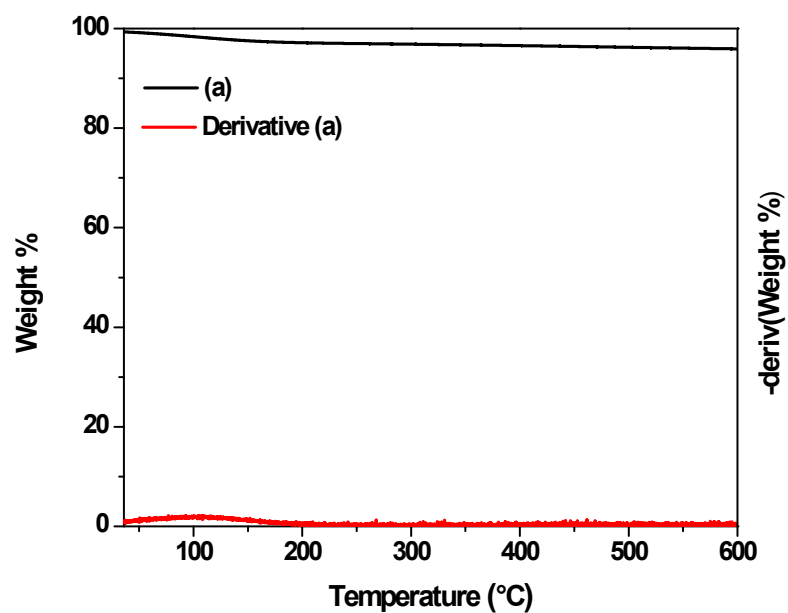

Figure S2: TGA measurements taken from Figure 4, shown as weight (%) vs. temperature (°C), of SiO<sub>2</sub>-OH NPs (black) and the first derivative with respect to weight % (red)

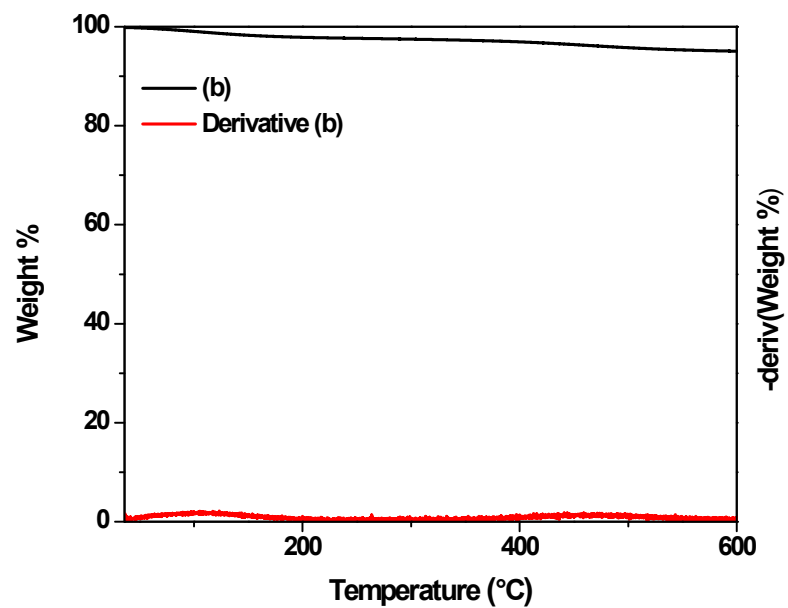

Figure S3: TGA measurements taken from Figure 4, shown as weight (%) vs. temperature (°C), of SiO<sub>2</sub>-GPS-OH NPs (black) and the first derivative with respect to weight % (red)

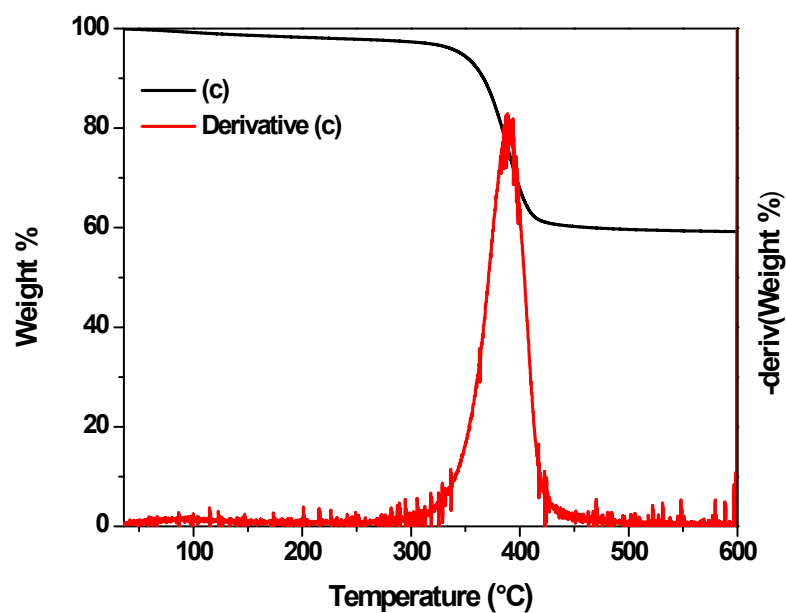

Figure S4: TGA measurements taken from Figure 4, shown as weight (%) vs. temperature (°C), of SiO<sub>2</sub>-GPS-PCL-OH NPs (black) and the first derivative with respect to weight % (red)

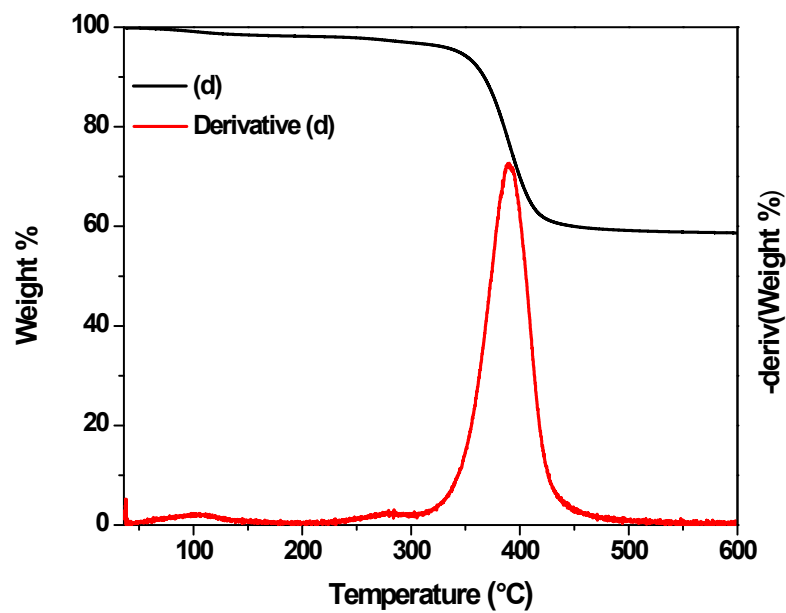

Figure S5: TGA measurements taken from Figure 4, shown as weight (%) vs. temperature (°C), of SiO<sub>2</sub>-GPS-PCL-Br NPs (black) and the first derivative with respect to weight % (red)

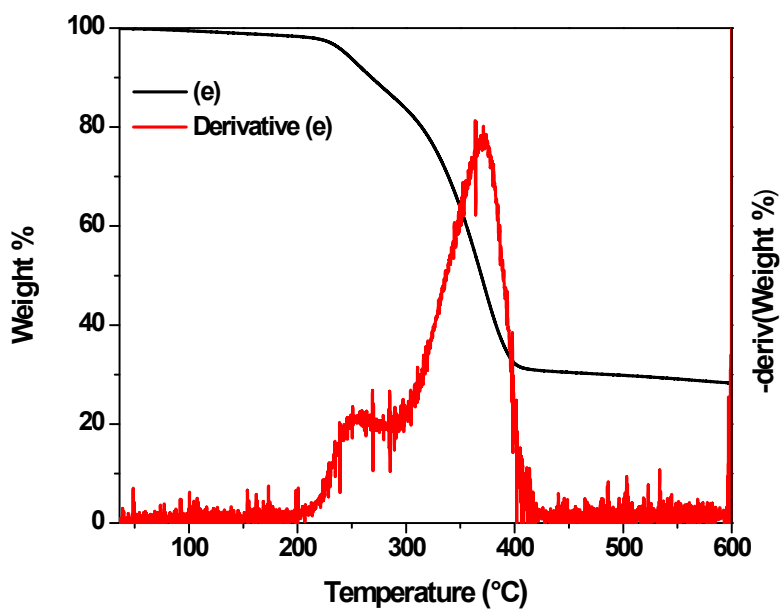

Figure S6: TGA measurements taken from Figure 4, shown as weight (%) vs. temperature (°C), of SiO<sub>2</sub>-GPS-PCL-POEGMA-Br NPs (black) and the first derivative with respect to weight % (red)

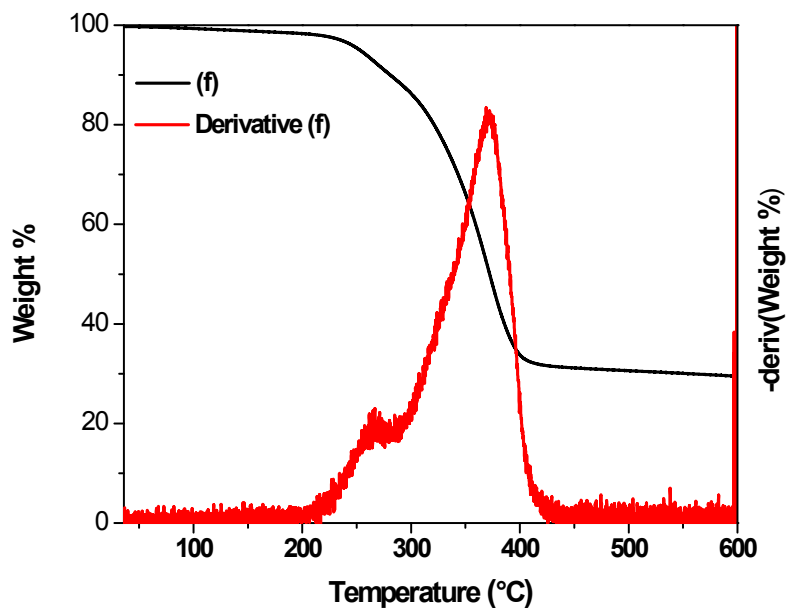

Figure S7: TGA measurements taken from Figure 4, shown as weight (%) vs. temperature (°C), of SiO<sub>2</sub>-GPS-PCL-POEGMA-Br NPs (black) and the first derivative with respect to weight % (red) after being dried and redispersed in deionized water four times



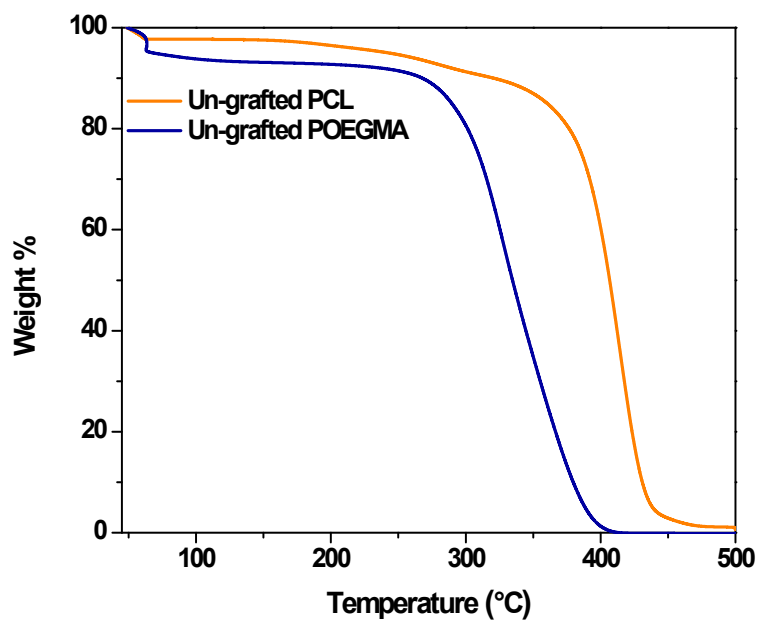

Figure S8: TGA measurements, shown as weight (%) vs. temperature (°C), of un-grafted PCL (gold) and un-grafted POEGMA (purple)

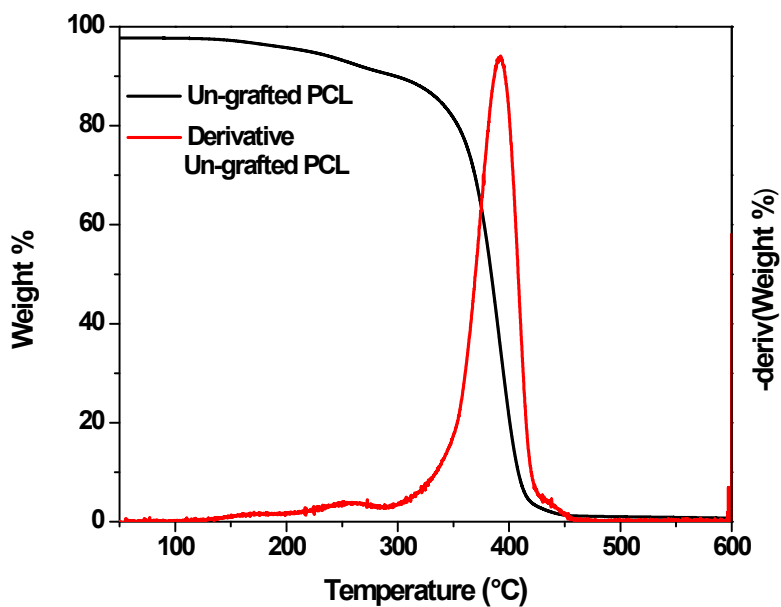

Figure S9: TGA measurements, shown as weight (%) vs. temperature (°C), of un-grafted PCL (black) and the first derivative with respect to weight % (red)

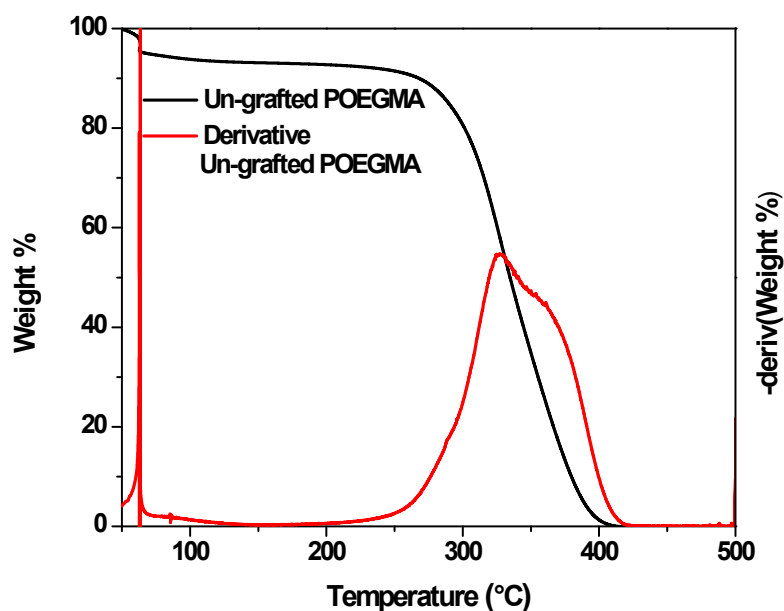

Figure S10: TGA measurements, shown as weight (%) vs. temperature (°C), of un-grafted POEGMA (black) and the first derivative with respect to weight % (red)

Table S1: Decomposition temperatures assignments, measured from TGA first derivative plots

| <b>Decomposition temp</b> | <b>Samples observed:</b>                                                                                                 | <b>Species</b> |
|---------------------------|--------------------------------------------------------------------------------------------------------------------------|----------------|
| 100                       | SiO <sub>2</sub> NP, SiO <sub>2</sub> -GPS NP                                                                            | water          |
| 475                       | SiO <sub>2</sub> -GPS NP                                                                                                 | GPS            |
| 400                       | SiO <sub>2</sub> -GPS-PCL NP                                                                                             | PCL            |
| 275                       | SiO <sub>2</sub> -GPS-PCL-Br NP, SiO <sub>2</sub> -GPS-PCL-POEGMA-Br NP, SiO <sub>2</sub> -GPS-PCL-POEGMA-Br NP (redisp) | POEGMA         |
| 250                       | ungrafted PCL                                                                                                            |                |
| 325                       | ungrafted POEGMA                                                                                                         |                |
| 375                       | ungrafted POEGMA                                                                                                         |                |
| 275                       | SiO <sub>2</sub> -GPS-POEGMA-Br NP                                                                                       |                |
| 350                       | SiO <sub>2</sub> -GPS-POEGMA-Br NP                                                                                       |                |

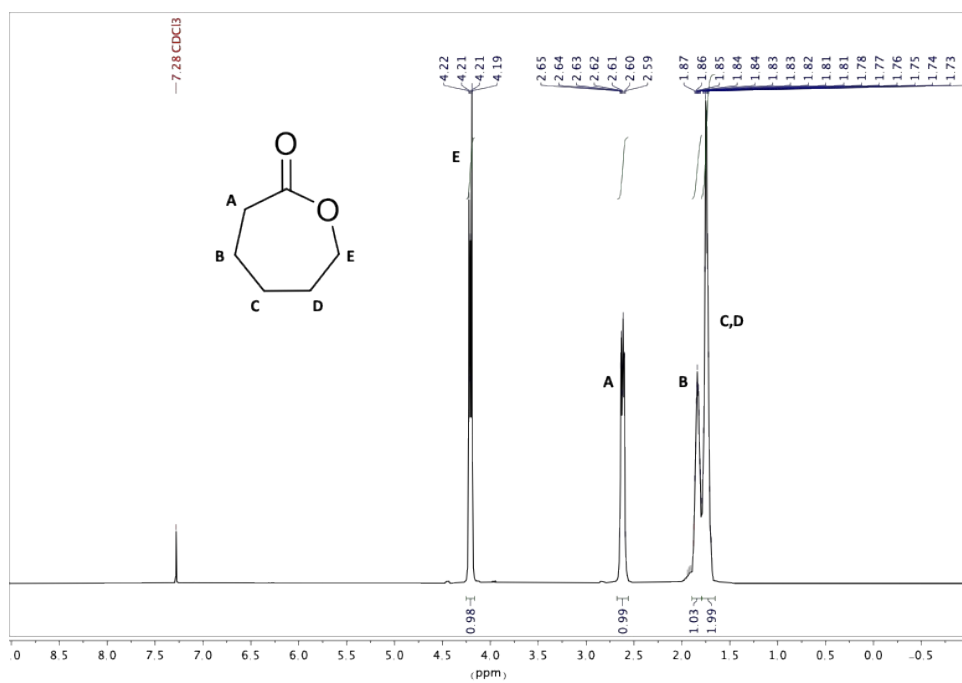

Figure S11:  $^1\text{H}$  NMR spectrum of  $\epsilon$ -caprolactone monomer with peaks at: 1.7 ppm (C, D  $\text{CH}_2$   $\gamma$ ,  $\delta$  position), 1.9 ppm (B  $\text{CH}_2$   $\beta$  position), 2.6 ppm (A  $\text{CH}_2$   $\alpha$  position), and 4.2 ppm (E  $\text{CH}_2$   $\epsilon$  position)

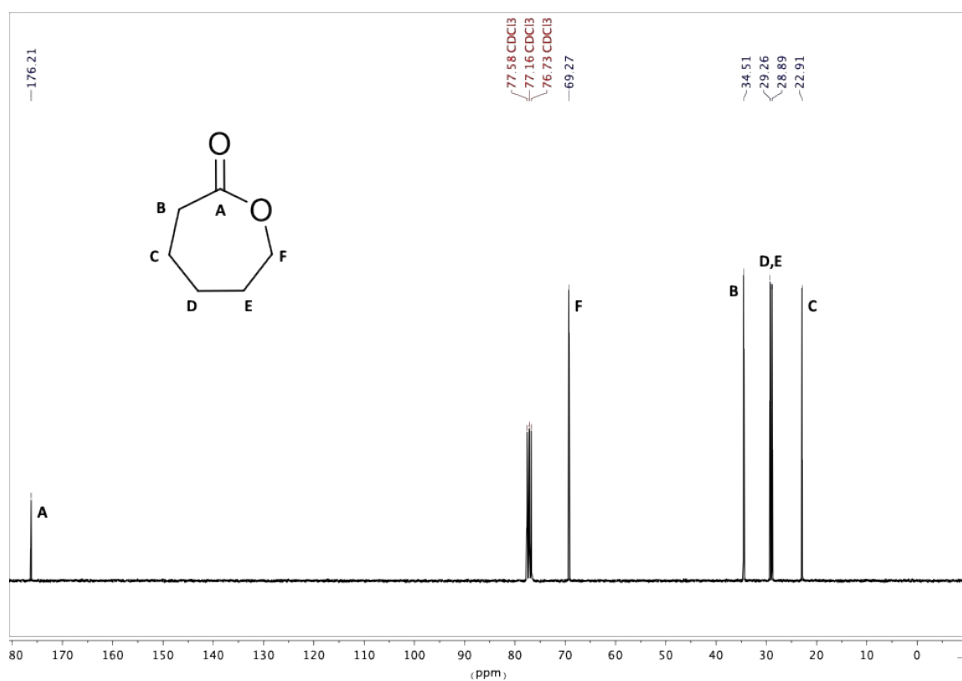

Figure S12:  $^{13}\text{C}$  NMR spectrum of  $\epsilon$ -caprolactone monomer with peaks at: 22.9 ppm (C  $\text{CH}_2$   $\beta$  position), 28.9 ppm (D  $\text{CH}_2$   $\gamma$  position), 29.3 ppm (E  $\text{CH}_2$   $\delta$  position), 34.5 ppm (B  $\text{CH}_2$   $\alpha$  position), 69.3 ppm (F  $\text{CH}_2$   $\epsilon$  position), and 176.2 ppm (A C(O))

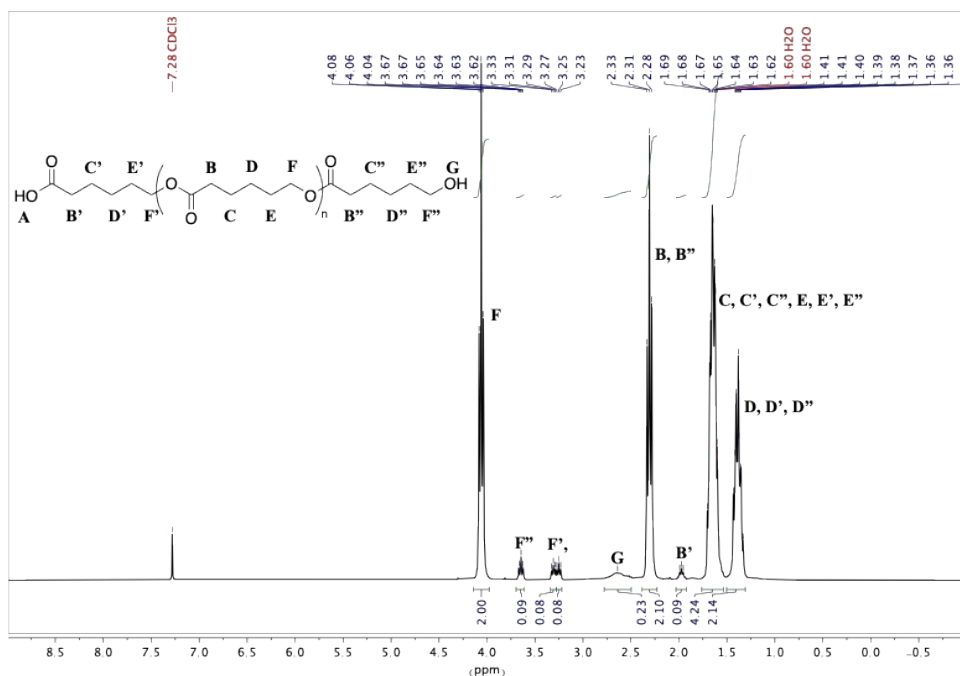

Figure S13:  $^1\text{H}$  NMR spectrum of water-initiated un-grafted PCL (Scheme 3-A, sample 2A and 2C) generated in situ with peaks at: 1.39 ppm ( $D, D', D''$   $\text{CH}_2$   $\gamma$  position), 1.66 ppm ( $C, C', C'', E, E', E''$   $\text{CH}_2$   $\beta, \delta$  position), 2.1 ppm ( $B', B''$   $\text{CH}_2$   $\alpha$  position), 2.31 ppm ( $B$   $\text{CH}_2$   $\alpha$  position), 3.3 ppm ( $F'$   $\text{CH}_2$   $\epsilon$  position), 3.65 ppm ( $F''$   $\text{CH}_2$   $\epsilon$  position), and 4.06 ppm ( $F$   $\text{CH}_2$   $\epsilon$  position)

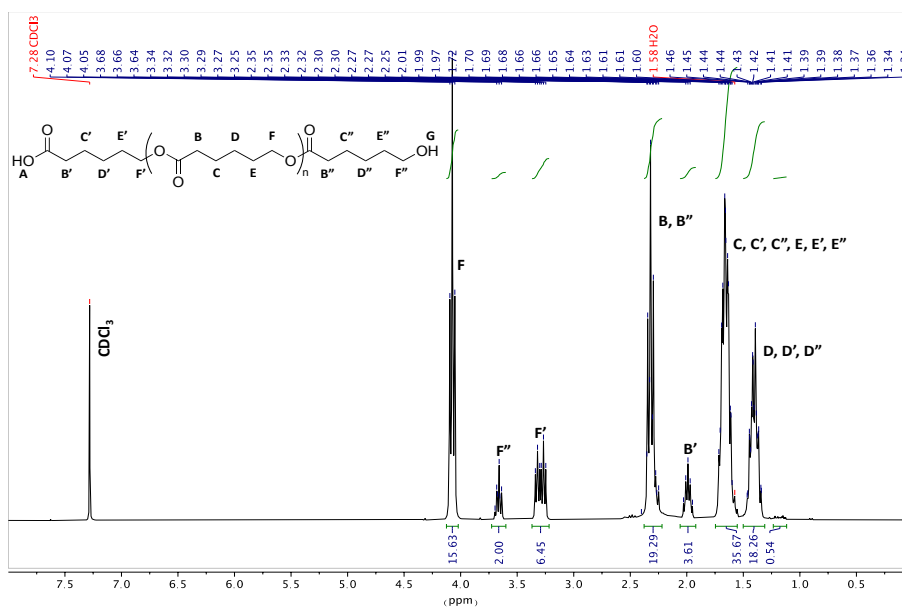

Figure S14:  $^1\text{H}$  NMR spectrum of water-initiated un-grafted PCL (Scheme 3-A, sample 2B) generated in situ with peaks at: 1.39 ppm ( $D, D', D''$   $\text{CH}_2$   $\gamma$  position), 1.66 ppm ( $C, C', C'', E, E', E''$   $\text{CH}_2$   $\beta, \delta$  position), 2.1 ppm ( $B', B''$   $\text{CH}_2$   $\alpha$  position), 2.31 ppm ( $B$   $\text{CH}_2$   $\alpha$  position), 3.3 ppm ( $F'$   $\text{CH}_2$   $\epsilon$  position), 3.65 ppm ( $F''$   $\text{CH}_2$   $\epsilon$  position), and 4.06 ppm ( $F$   $\text{CH}_2$   $\epsilon$  position)

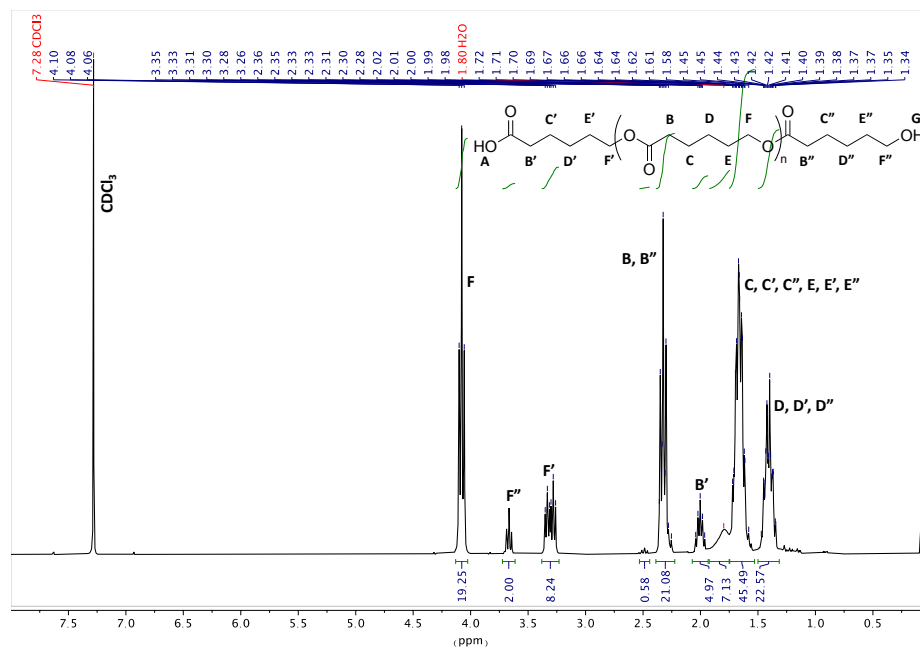

Figure S15:  $^1\text{H}$  NMR spectrum of water-initiated un-grafted PCL (Scheme 3-A, sample 2D) generated in situ with peaks at: 1.39 ppm ( $\text{D, D', D''}$   $\text{CH}_2$   $\gamma$  position), 1.66 ppm ( $\text{C, C', C''}$ ,  $\text{E, E', E''}$   $\text{CH}_2$   $\beta$ ,  $\delta$  position), 2.1 ppm ( $\text{B, B''}$   $\text{CH}_2$   $\alpha$  position), 2.31 ppm ( $\text{B}$   $\text{CH}_2$   $\alpha$  position), 3.3 ppm ( $\text{F'}$   $\text{CH}_2$   $\epsilon$  position), 3.65 ppm ( $\text{F''}$   $\text{CH}_2$   $\epsilon$  position), and 4.06 ppm ( $\text{F}$   $\text{CH}_2$   $\epsilon$  position)

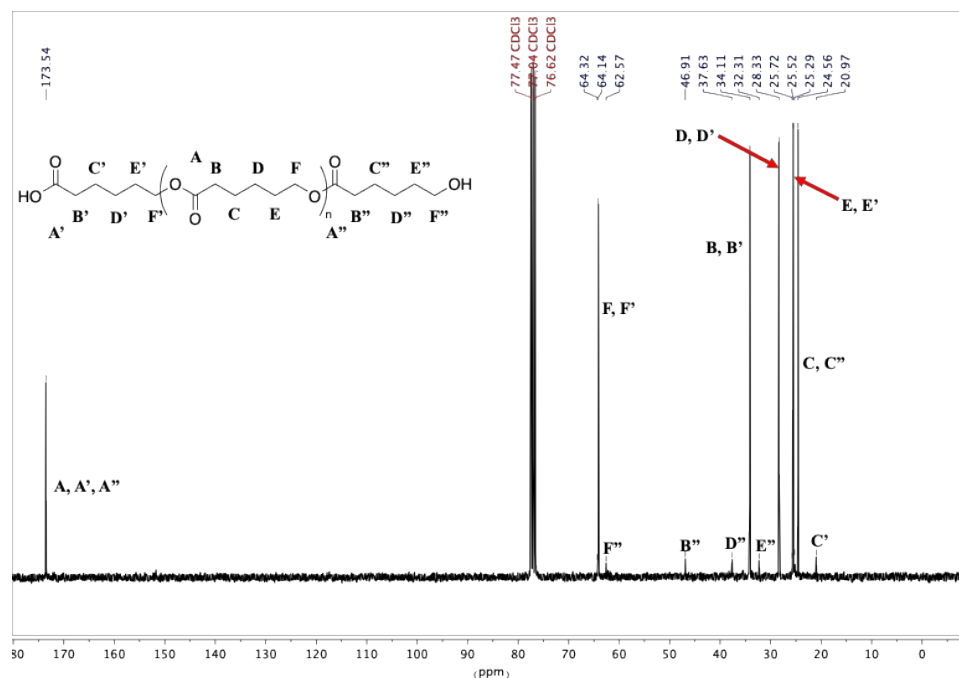

Figure S16:  $^{13}\text{C}$  NMR spectrum of water-initiated PCL (Scheme 3-A, sample 2A) generated in situ with peaks at: 24.6 ppm ( $\text{C, C', C''}$   $\text{CH}_2$   $\beta$  position), 25.5 ppm ( $\text{E, E'}$   $\text{CH}_2$   $\delta$  position), 28.3 ppm ( $\text{D, D', D''}$   $\text{CH}_2$   $\gamma$  position), 32.3 ppm ( $\text{E''}$   $\text{CH}_2$   $\delta$  position), 34.1 ppm ( $\text{B, B', B''}$   $\text{CH}_2$   $\alpha$  position), 62 ppm ( $\text{F''}$   $\text{CH}_2$   $\epsilon$  position), 64.2 ppm ( $\text{F, F'}$   $\text{CH}_2$   $\epsilon$  position), and 173.6 ppm ( $\text{A, A''}$   $\text{C}(\text{O})$ )

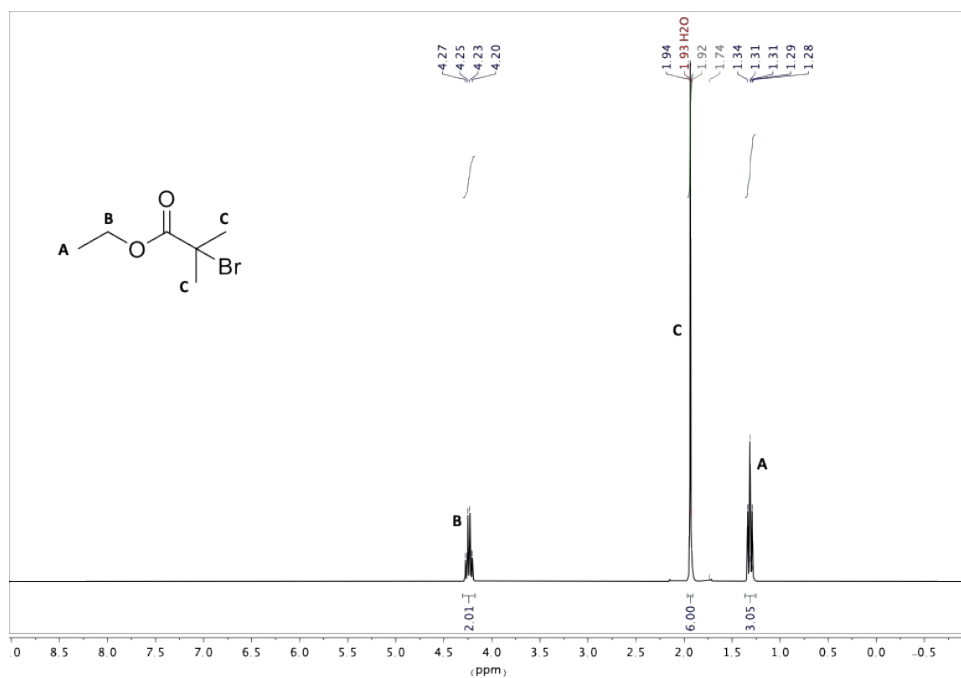

Figure S17: <sup>1</sup>H NMR spectrum of ethyl 2-bromoisobutyrate (EBiB) with peaks at: 1.3 ppm (A CH<sub>3</sub>-CH<sub>2</sub>), 1.9 ppm (C (CH<sub>3</sub>)<sub>2</sub>-C(Br)), and 4.2 ppm (B CH<sub>3</sub>-CH<sub>2</sub>-O)

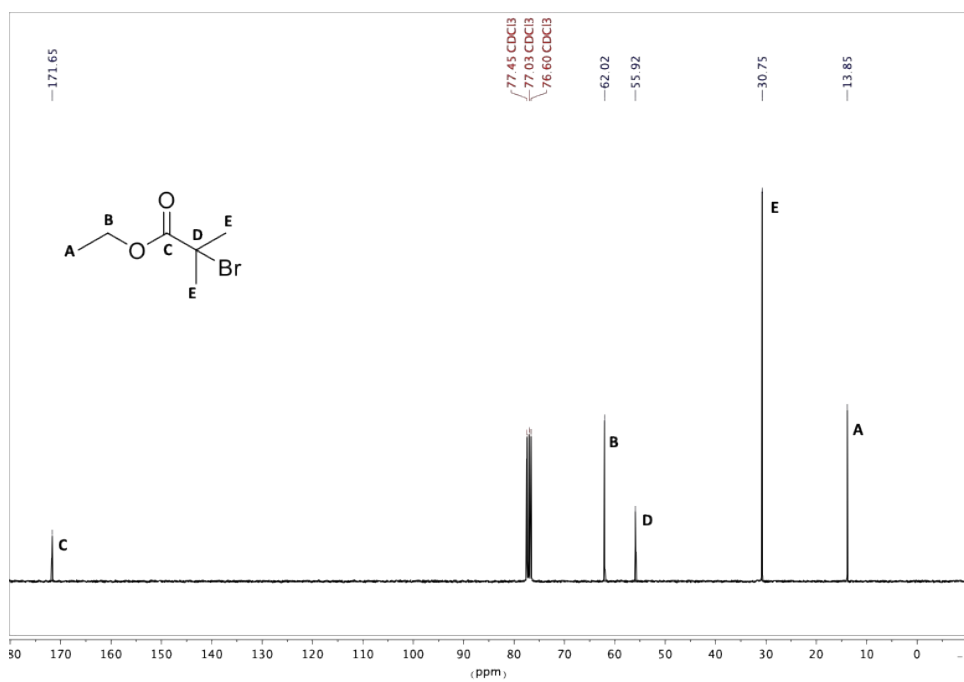

Figure S18: <sup>13</sup>C NMR spectrum of ethyl 2-bromoisobutyrate (EBiB) with peaks at: 13.9 ppm (A CH<sub>3</sub>-CH<sub>2</sub>), 30.8 ppm (E (CH<sub>3</sub>)<sub>2</sub>-C(Br)), 55.9 ppm (D C(O)-C(CH<sub>3</sub>)<sub>2</sub>-Br), 62.0 ppm (B CH<sub>3</sub>-CH<sub>2</sub>-O), and 171.7 ppm (C O-C(O)-C(CH<sub>3</sub>)<sub>2</sub>)

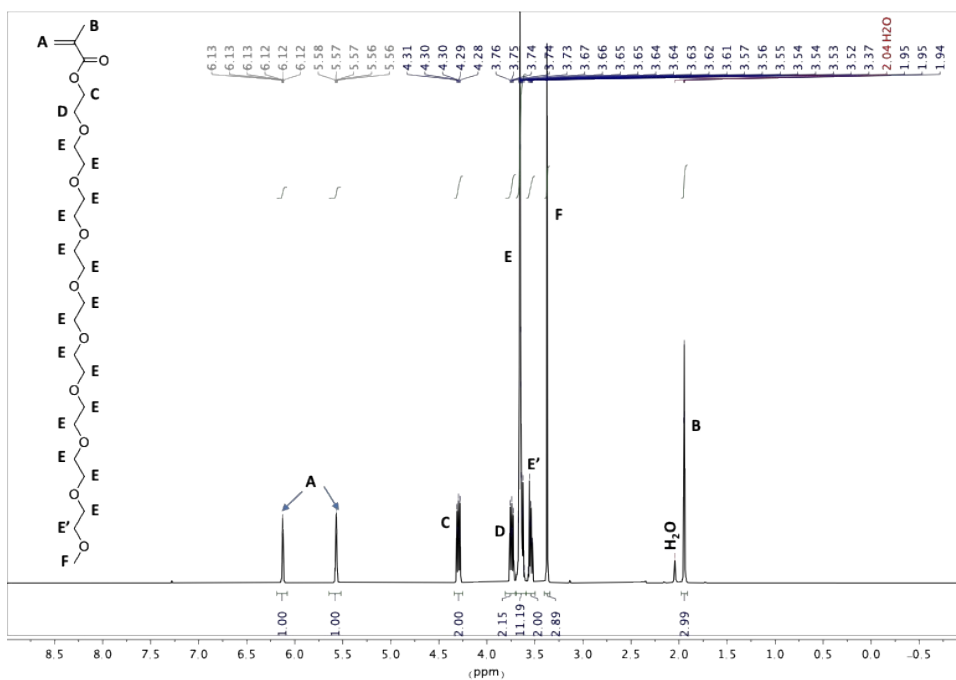

Figure S19:  $^1\text{H}$  NMR spectrum of oligo(ethylene glycol) mono-methyl ether methacrylate (OEGMA) with peaks at: 1.9 ppm (B  $\text{CH}_3\text{-C}$ ), 3.4 ppm (F  $\text{O-CH}_3$ ), 3.5 ppm ( $\text{E}'$   $\text{CH}_2\text{-CH}_2\text{-O(CH}_3\text{)}$ ), 3.6 ppm (E  $\text{CH}_2\text{-CH}_2\text{-O(CH}_2\text{)}$ ), 3.7 ppm (D  $\text{CH}_2\text{-CH}_2\text{-CH}_2$ ), 4.3 ppm (C  $\text{CH}_2\text{-CH}_2\text{-CH}_2$ ), 5.6 and 6.1 ppm (A  $\text{CH}_2\text{-CH}_2\text{-CH}_2$ )

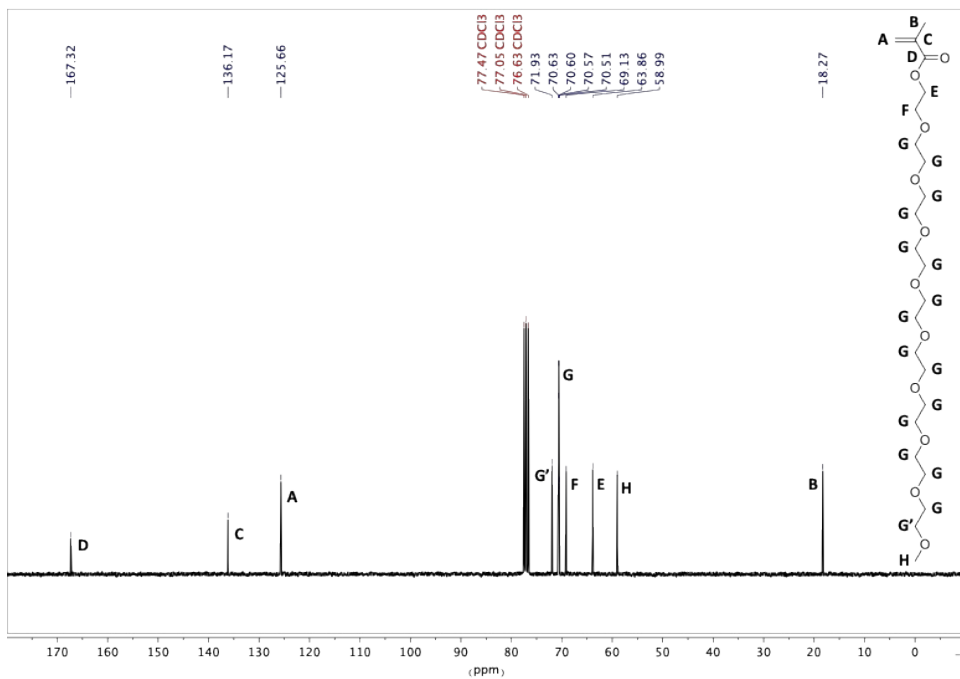

Figure S20:  $^{13}\text{C}$  NMR spectrum of oligo(ethylene glycol) mono-methyl ether methacrylate (OEGMA) with peaks at: 18.3 ppm (B  $\text{CH}_3\text{-C}$ ), 58.9 ppm (H  $\text{O-CH}_3$ ), 63.9 ppm (E  $\text{O-CH}_2\text{-CH}_2$ ), 69.1 ppm (F  $\text{CH}_2\text{-CH}_2\text{-O}$ ), 70.6 ppm (G  $\text{O-CH}_2\text{-CH}_2\text{-O}$ ), 71.9 ppm (G'  $\text{CH}_2\text{-CH}_2\text{-O}$ ), 125.7 ppm (A  $\text{CH}_2\text{-C(CH}_3\text{)}$ ), 136.2 ppm (C  $\text{CH}_2\text{-C(CH}_3\text{)-C(O)}$ ), and 167.3 ppm (D  $\text{C(CH}_3\text{)-C(O)-O}$ )

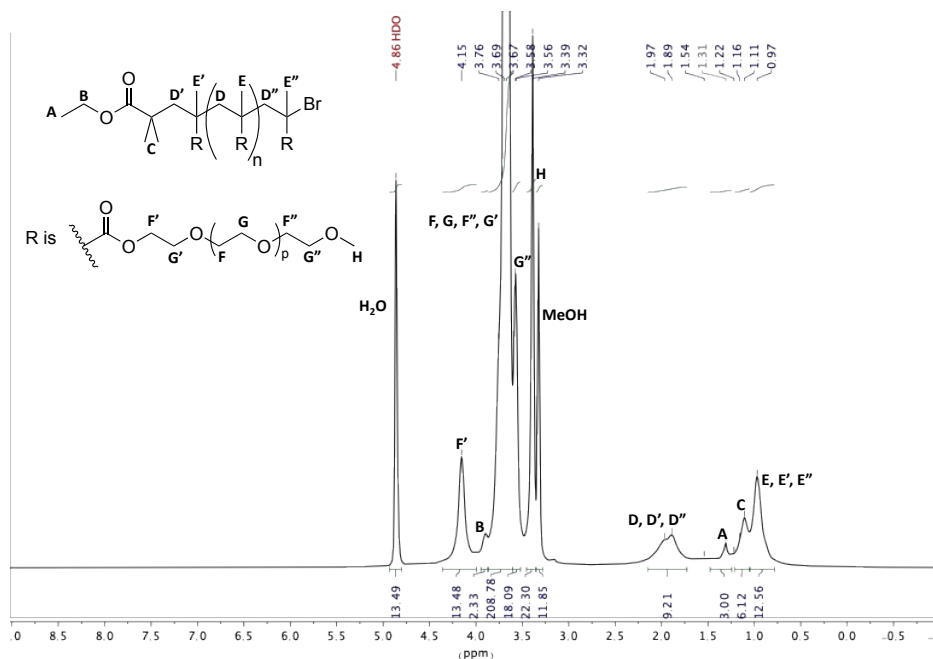

Figure S21:  $^1\text{H}$  NMR spectrum of EBiB-initiated POEGMA (Scheme 3-B, sample 4A) generated in situ with peaks at: 0.95 ppm (E, E', E''  $\text{CH}_3\text{-C}(\text{R})_3$ ), 1.1 ppm (C  $(\text{CH}_3)_2\text{-C}(\text{R})_2$ ), 1.31 ppm (A  $\text{CH}_3\text{-CH}_2\text{-O}$ ), 1.9 ppm (D, D', D''  $\text{C}(\text{CH}_3)\text{-CH}_2\text{-C}(\text{CH}_3)$ ), 3.4 ppm (H  $\text{CH}_2\text{-O-CH}_3$ ), 3.58 ppm (G''  $\text{O-CH}_2\text{-CH}_2\text{-O}$ ), 3.67 ppm (F, F'', G  $\text{O-CH}_2\text{-CH}_2\text{-O}$ ), 3.76 ppm (B  $\text{CH}_3\text{-CH}_2\text{-O}$ ), and 4.15 ppm (F'  $\text{O-CH}_2\text{-CH}_2\text{-O}$ )

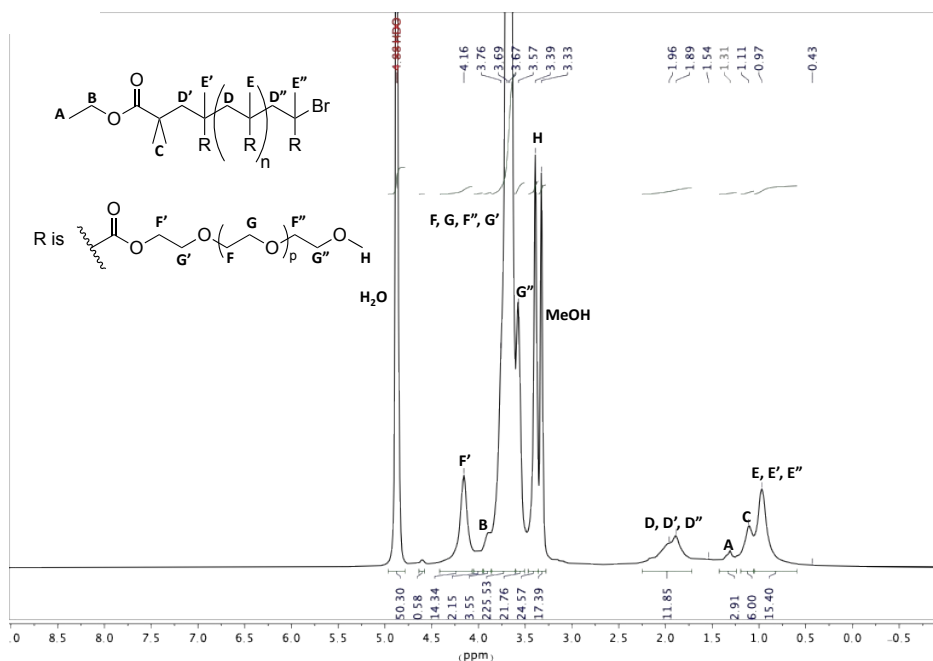

Figure S22:  $^1\text{H}$  NMR spectrum of EBiB-initiated POEGMA (Scheme 3-B, sample 4B) generated in situ with peaks at: 0.95 ppm (E, E', E''  $\text{CH}_3\text{-C}(\text{R})_3$ ), 1.1 ppm (C  $(\text{CH}_3)_2\text{-C}(\text{R})_2$ ), 1.31 ppm (A  $\text{CH}_3\text{-CH}_2\text{-O}$ ), 1.9 ppm (D, D', D''  $\text{C}(\text{CH}_3)\text{-CH}_2\text{-C}(\text{CH}_3)$ ), 3.4 ppm (H  $\text{CH}_2\text{-O-CH}_3$ ), 3.58 ppm (G''  $\text{O-CH}_2\text{-CH}_2\text{-O}$ ), 3.67 ppm (F, F'', G  $\text{O-CH}_2\text{-CH}_2\text{-O}$ ), 3.76 ppm (B  $\text{CH}_3\text{-CH}_2\text{-O}$ ), and 4.15 ppm (F'  $\text{O-CH}_2\text{-CH}_2\text{-O}$ )



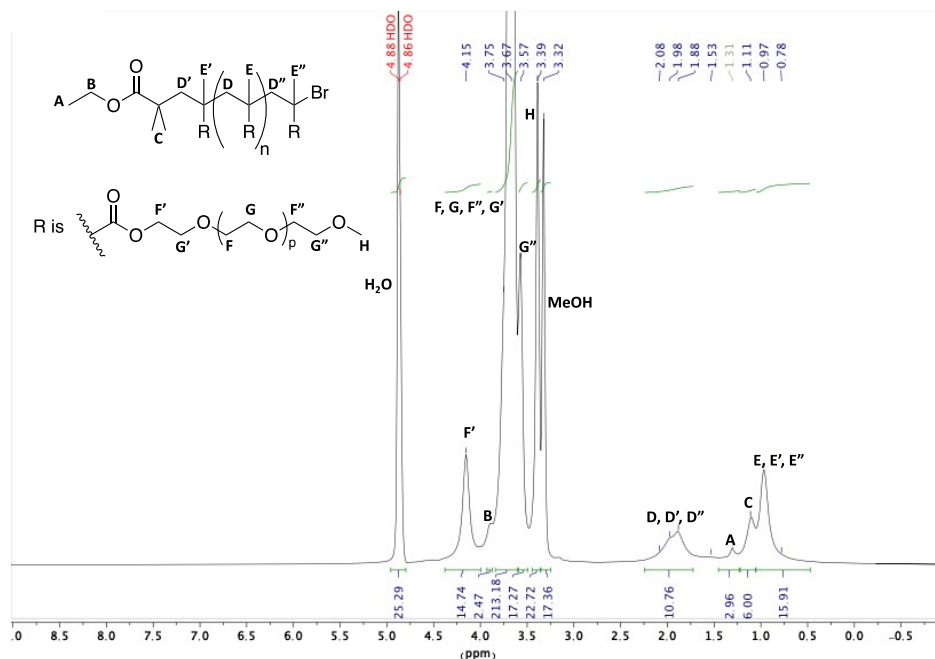

Figure S23:  $^1\text{H}$  NMR spectrum of EBiB-initiated POEGMA (Scheme 3-B, sample 4C) generated in situ with peaks at: 0.95 ppm (E, E', E''  $\text{CH}_3\text{-C(R)}_3$ ), 1.1 ppm (C  $\text{(CH}_3\text{)}_2\text{-C(R)}_2$ ), 1.31 ppm (A  $\text{CH}_3\text{-CH}_2\text{-O}$ ), 1.9 ppm (D, D', D''  $\text{C(CH}_3\text{)-CH}_2\text{-C(CH}_3\text{)}$ ), 3.4 ppm (H  $\text{CH}_2\text{-O-CH}_3$ ), 3.58 ppm (G''  $\text{O-CH}_2\text{-CH}_2\text{-O}$ ), 3.67 ppm (F, F'', G  $\text{O-CH}_2\text{-CH}_2\text{-O}$ ), 3.76 ppm (B  $\text{CH}_3\text{-CH}_2\text{-O}$ ), and 4.15 ppm (F'  $\text{O-CH}_2\text{-CH}_2\text{-O}$ )

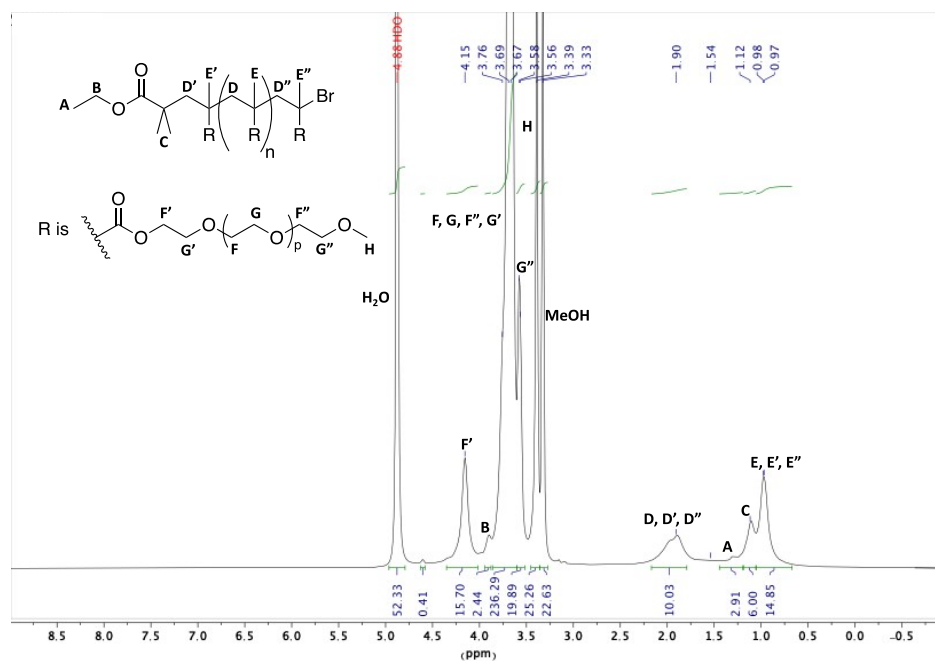

Figure S24:  $^1\text{H}$  NMR spectrum of EBiB-initiated POEGMA (Scheme 3-B, 4D) generated in situ with peaks at: 0.95 ppm (E, E', E''  $\text{CH}_3\text{-C(R)}_3$ ), 1.1 ppm (C  $\text{(CH}_3\text{)}_2\text{-C(R)}_2$ ), 1.31 ppm (A  $\text{CH}_3\text{-CH}_2\text{-O}$ ), 1.9 ppm (D, D', D''  $\text{C(CH}_3\text{)-CH}_2\text{-C(CH}_3\text{)}$ ), 3.4 ppm (H  $\text{CH}_2\text{-O-CH}_3$ ), 3.58 ppm (G''  $\text{O-CH}_2\text{-CH}_2\text{-O}$ ), 3.67 ppm (F, F'', G  $\text{O-CH}_2\text{-CH}_2\text{-O}$ ), 3.76 ppm (B  $\text{CH}_3\text{-CH}_2\text{-O}$ ), and 4.15 ppm (F'  $\text{O-CH}_2\text{-CH}_2\text{-O}$ )

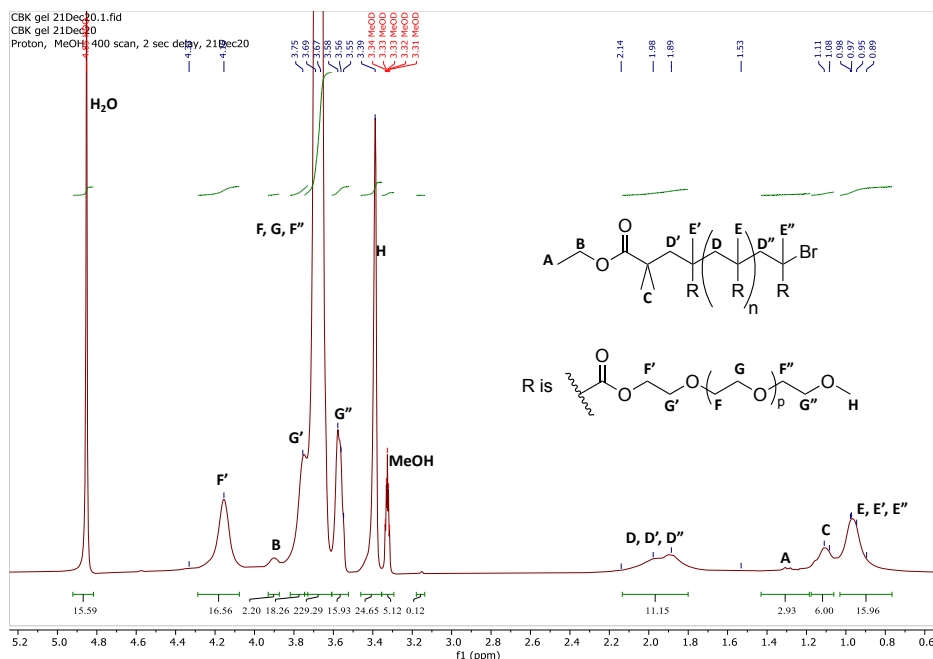

Figure S25:  $^1\text{H}$  NMR spectrum of EBiB-initiated POEGMA (Scheme 3-B, sample 6) generated in situ with peaks at: 0.95 ppm (E, E', E''  $\text{CH}_3\text{-C}(\text{R})_3$ ), 1.1 ppm (C  $(\text{CH}_3)_2\text{-C}(\text{R})_2$ ), 1.31 ppm (A  $\text{CH}_3\text{-CH}_2\text{-O}$ ), 1.9 ppm (D, D', D''  $\text{C}(\text{CH}_3)\text{-CH}_2\text{-C}(\text{CH}_3)$ ), 3.4 ppm (H  $\text{CH}_2\text{-O-CH}_3$ ), 3.58 ppm (G''  $\text{O-CH}_2\text{-CH}_2\text{-O}$ ), 3.67 ppm (F, F', G  $\text{O-CH}_2\text{-CH}_2\text{-O}$ ), 3.76 ppm (B  $\text{CH}_3\text{-CH}_2\text{-O}$ ), and 4.15 ppm (F'  $\text{O-CH}_2\text{-CH}_2\text{-O}$ )

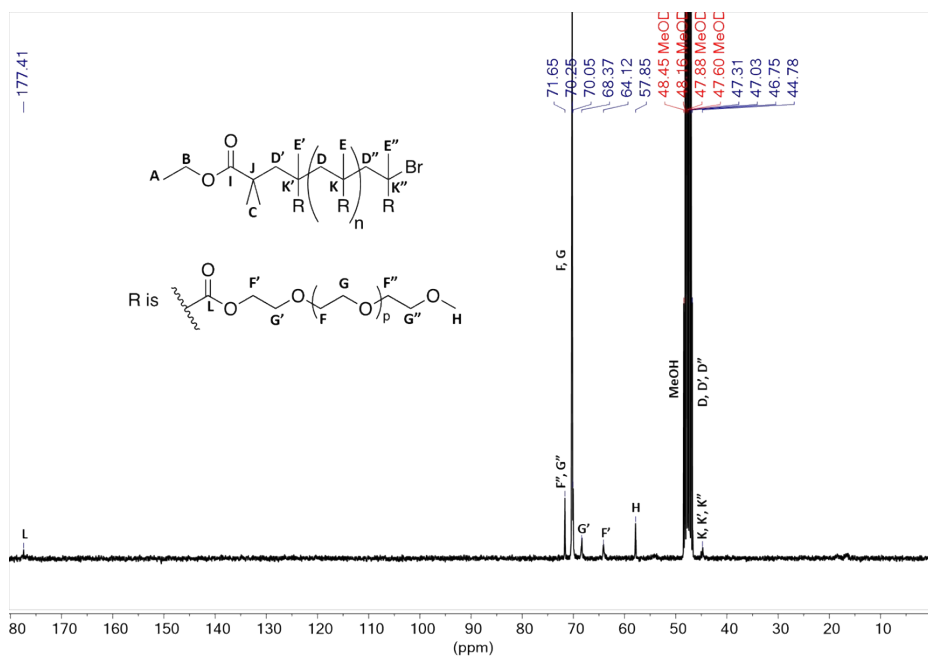

Figure S26:  $^{13}\text{C}$  NMR spectrum of EBiB-initiated POEGMA (Scheme 3-B, sample 4A) generated in situ with peaks at: 44.78-46.75 ppm (K, K', K''  $\text{CH}_2\text{-C}(\text{CH}_3)\text{-CH}_2$ ), 47.31 ppm (D, D', D''  $\text{C}(\text{CH}_3)\text{-CH}_2\text{-C}(\text{CH}_3)$ ), 57.85 ppm (H  $\text{O-CH}_3$ ), 64.12 ppm (F'  $\text{O-CH}_2\text{-CH}_2\text{-O}$ ), 68.37 ppm (G'  $\text{O-CH}_2\text{-CH}_2\text{-O}$ ), 70.05-70.25 ppm (F, G  $\text{O-CH}_2\text{-CH}_2\text{-O}$ ), and 71.65 ppm (F'', G''  $\text{O-CH}_2\text{-CH}_2\text{-O}$ ), 177.41 ppm (L  $\text{C}(\text{CH}_3)\text{-C}(\text{O})\text{-CH}_2$ )

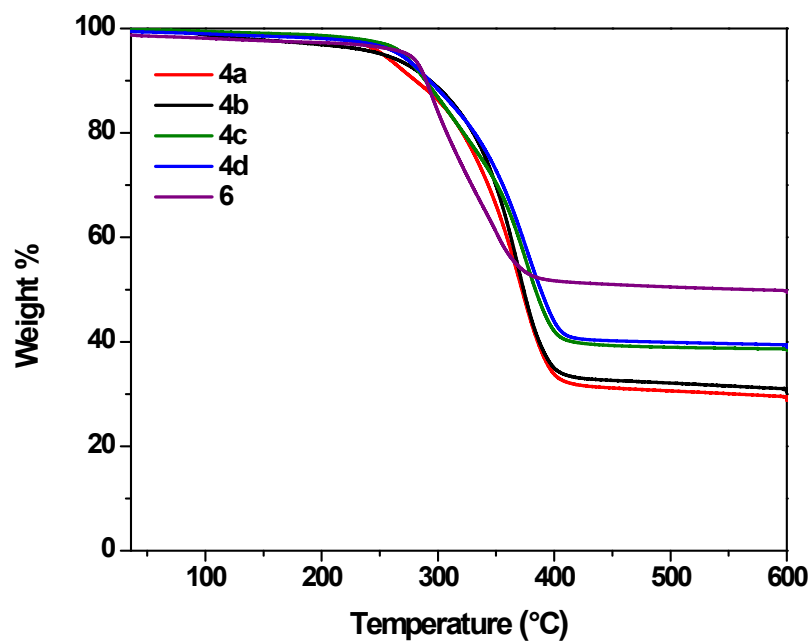

Figure S27: TGA measurements, shown as weight (%) vs. temperature (°C), of  $\text{SiO}_2$ -GPS-PCL-POEGMA-Br NPs (Samples 4a-d) alongside  $\text{SiO}_2$ -GPS-POEGMA-Br NPs (Sample 6)

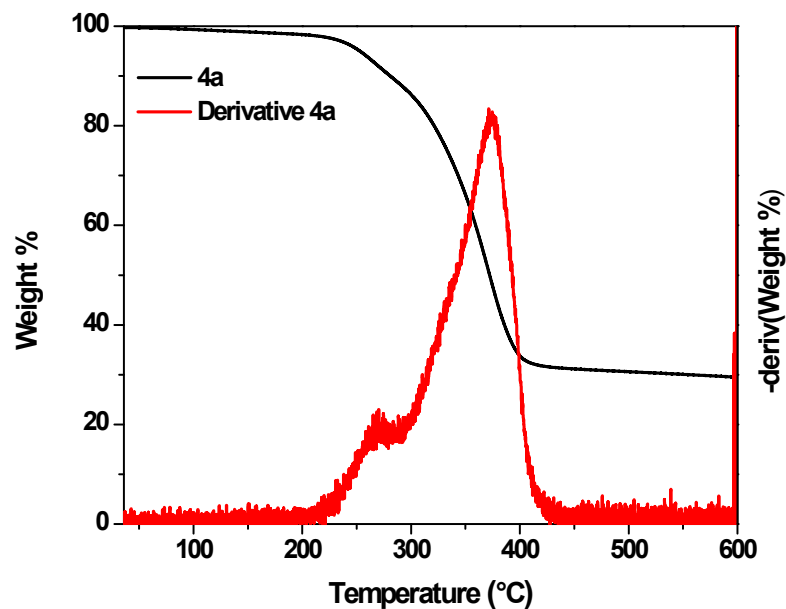

Figure S28: TGA measurements (black), shown as weight (%) vs. temperature (°C), of  $\text{SiO}_2$ -GPS-PCL-POEGMA-Br NPs (Samples 4a) alongside the first derivative with respect to weight percent (red)

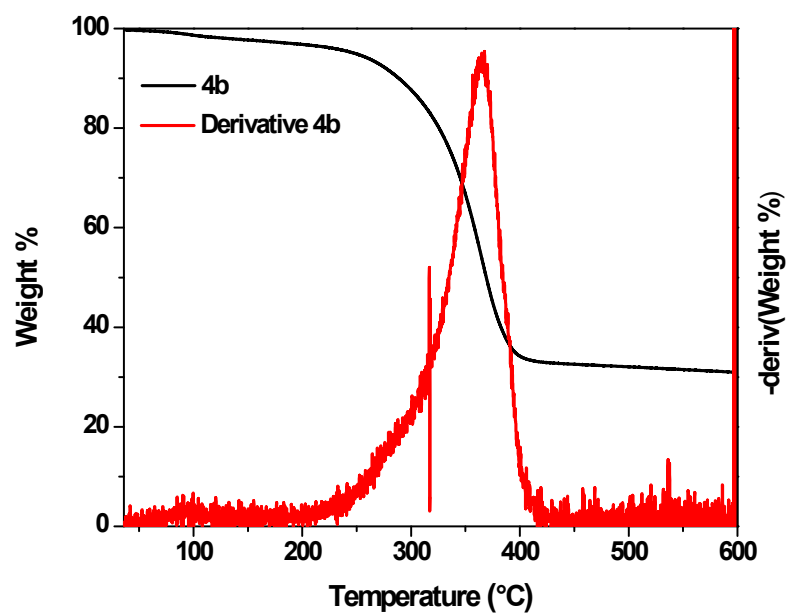

Figure S29: TGA measurements (black), shown as weight (%) vs. temperature (°C), of  $\text{SiO}_2$ -GPS-PCL-POEGMA-Br NPs (Samples 4b) alongside the first derivative with respect to weight percent (red)

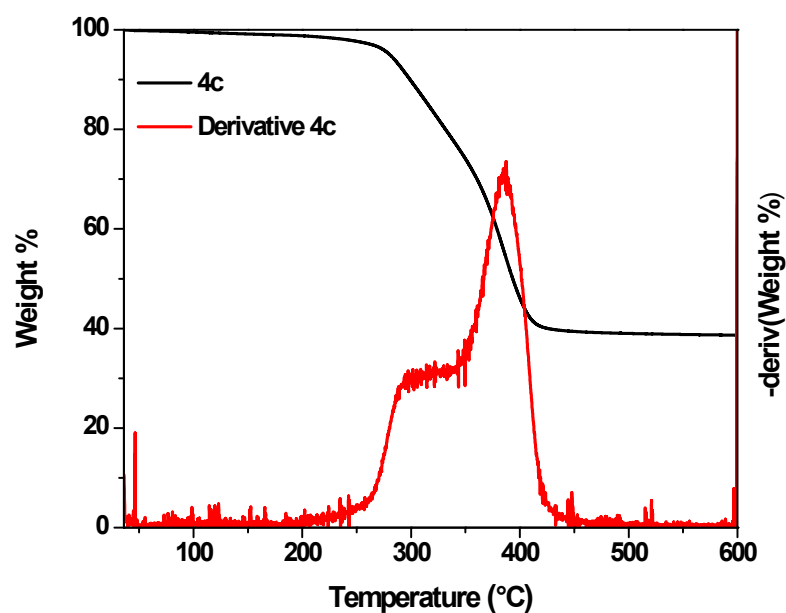

Figure S30: TGA measurements (black), shown as weight (%) vs. temperature (°C), of  $\text{SiO}_2$ -GPS-PCL-POEGMA-Br NPs (Samples 4c) alongside the first derivative with respect to weight percent (red)

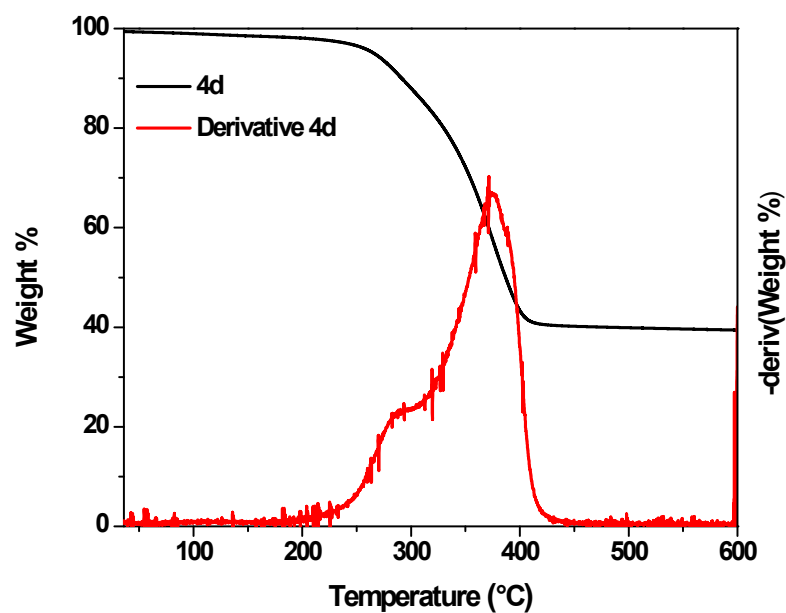

Figure S31: TGA measurements (black), shown as weight (%) vs. temperature (°C), of  $\text{SiO}_2$ -GPS-PCL-POEGMA-Br NPs (Samples 4d) alongside the first derivative with respect to weight percent (red)

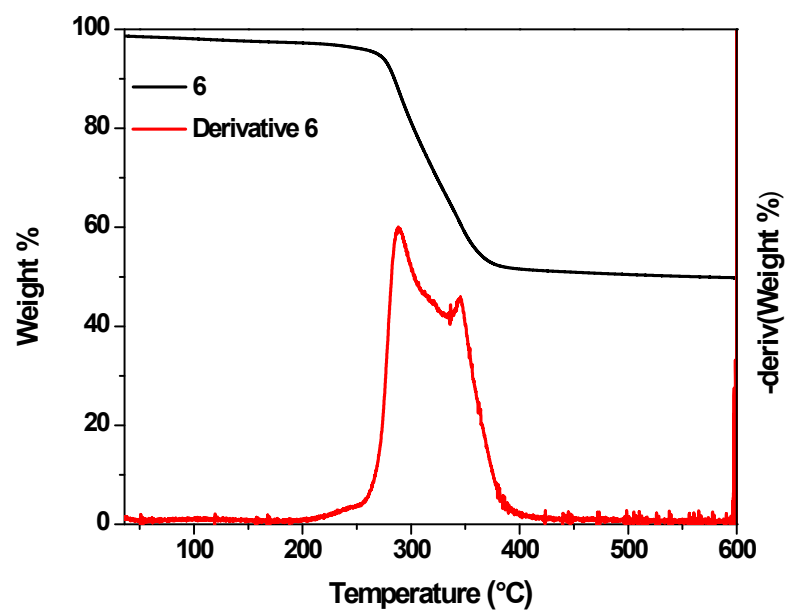

Figure S32: TGA measurements (black), shown as weight (%) vs. temperature (°C), of  $\text{SiO}_2$ -GPS-POGEMA-Br NPs (Sample 6) alongside the first derivative with respect to weight percent (red) before HF treatment to remove the silica NP core

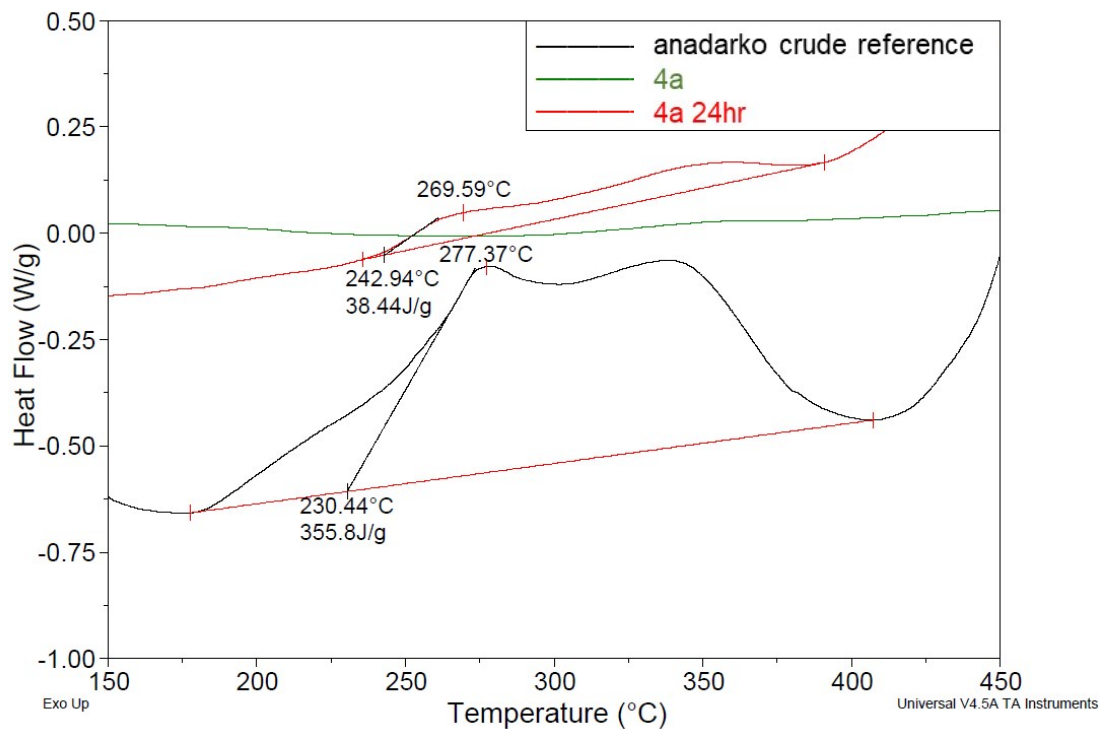

Figure S33: Sample 4a without oil exposure (green) and after 24 hr of oil exposure (red) compared the Anadarko crude oil reference showing a 30:1 oil:NP uptake in a 24 hr testing window

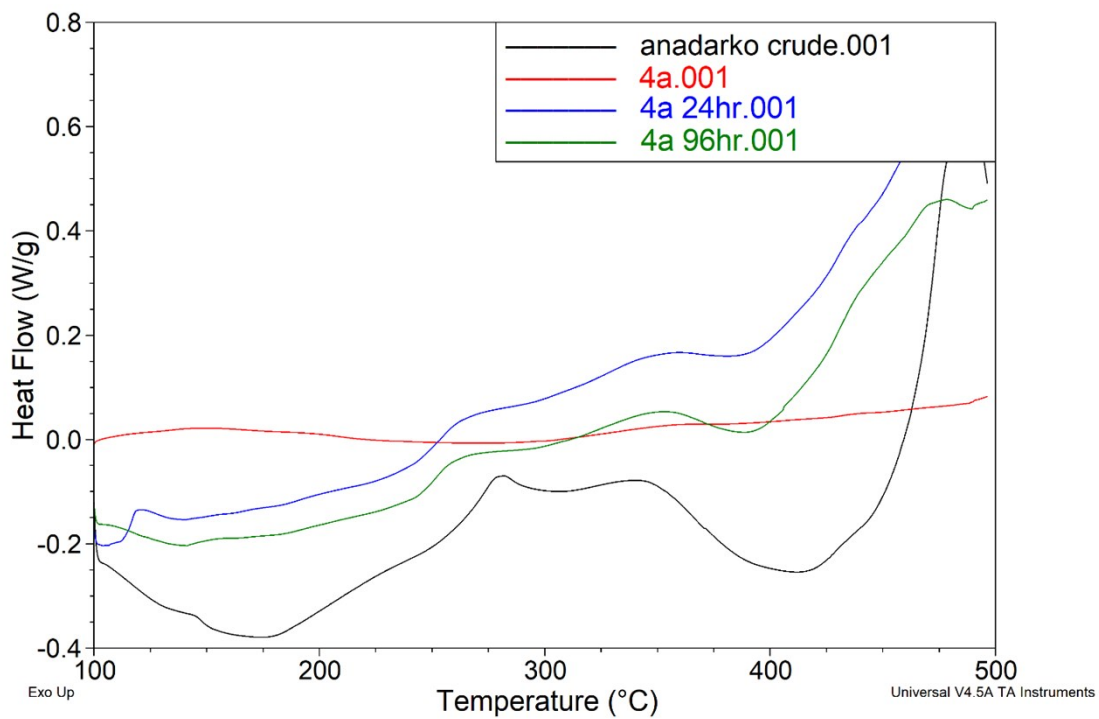

Figure S34: Sample 4a without oil exposure (red) and after 24 hr (blue) and 96 hr (green) of oil exposure compared the Anadarko crude oil reference

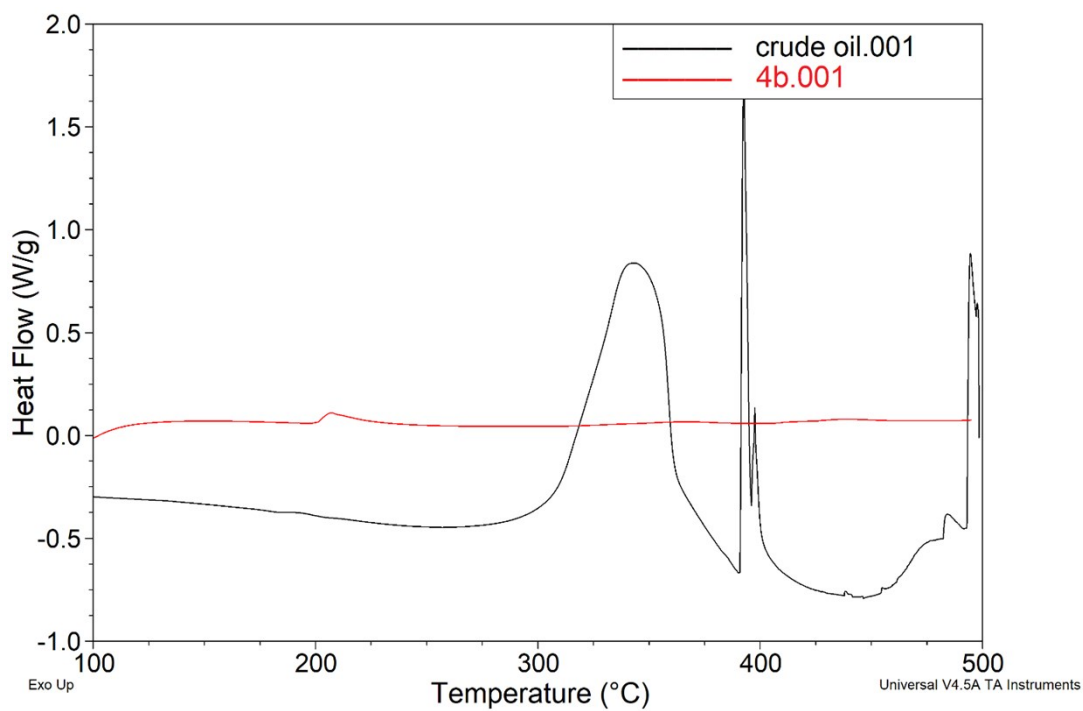

Figure S35: Sample 4b exposed to BP crude oil for 72 hr (red)

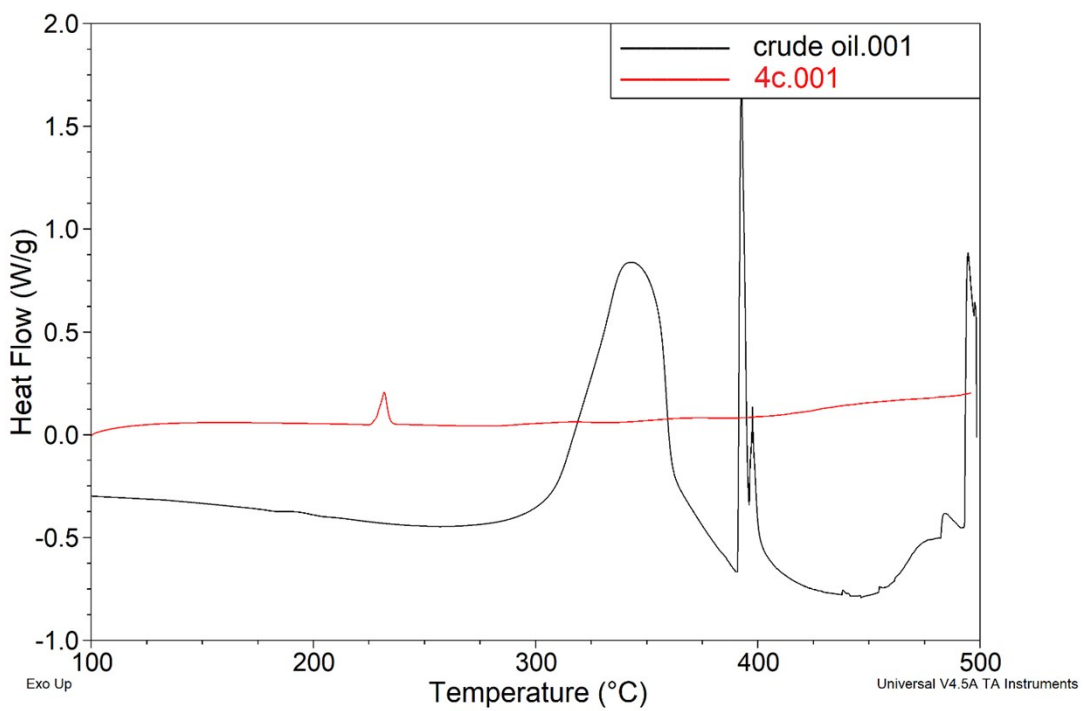

Figure S36: Sample 4c exposed to BP crude oil for 72 hr (red)

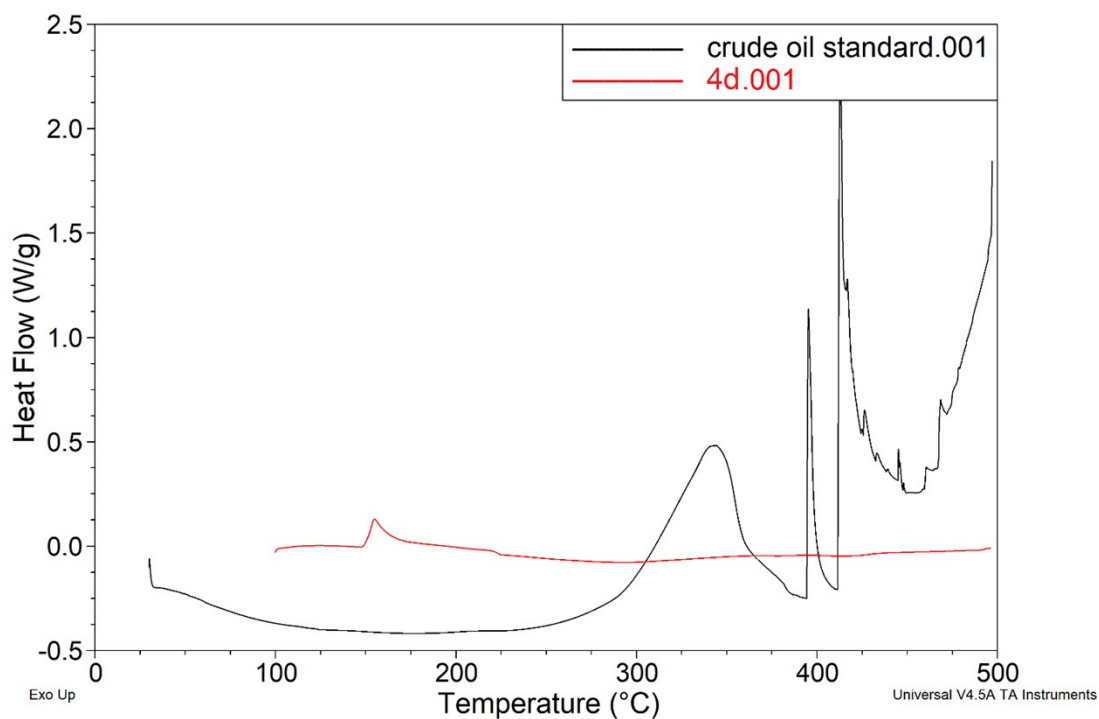

Figure S37: Sample 4d exposed to BP crude oil for 72 hr (red)

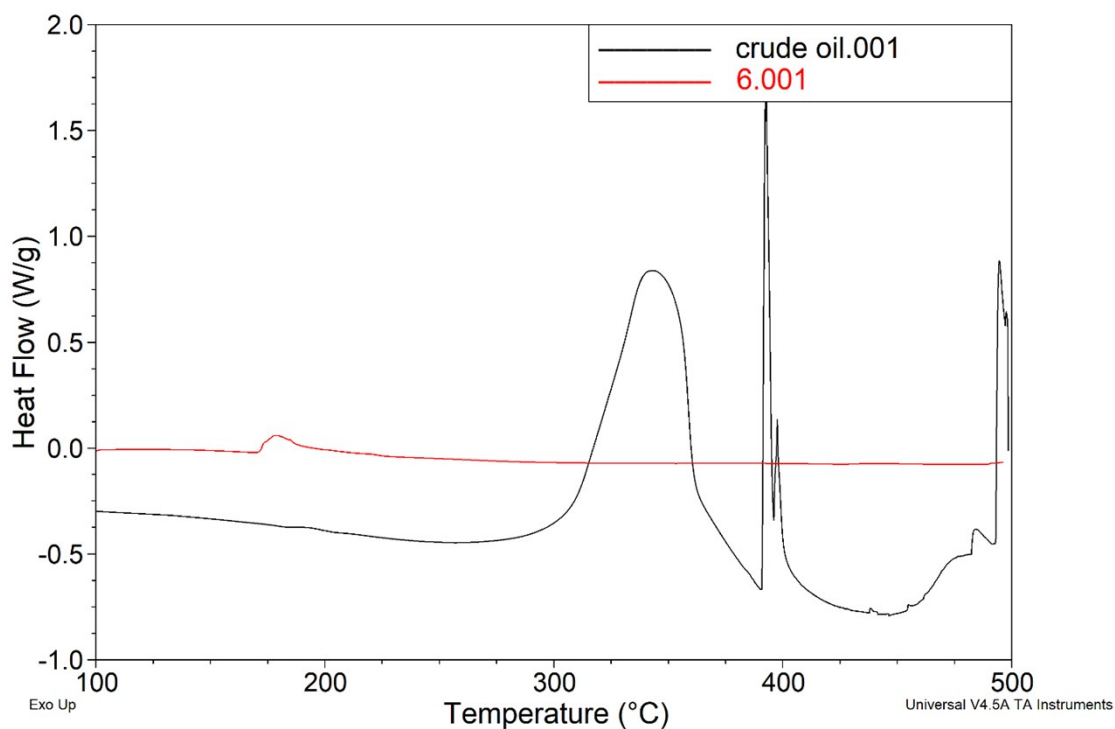

Figure S38: Sample 6 exposed to BP crude oil for 72 hr (red)



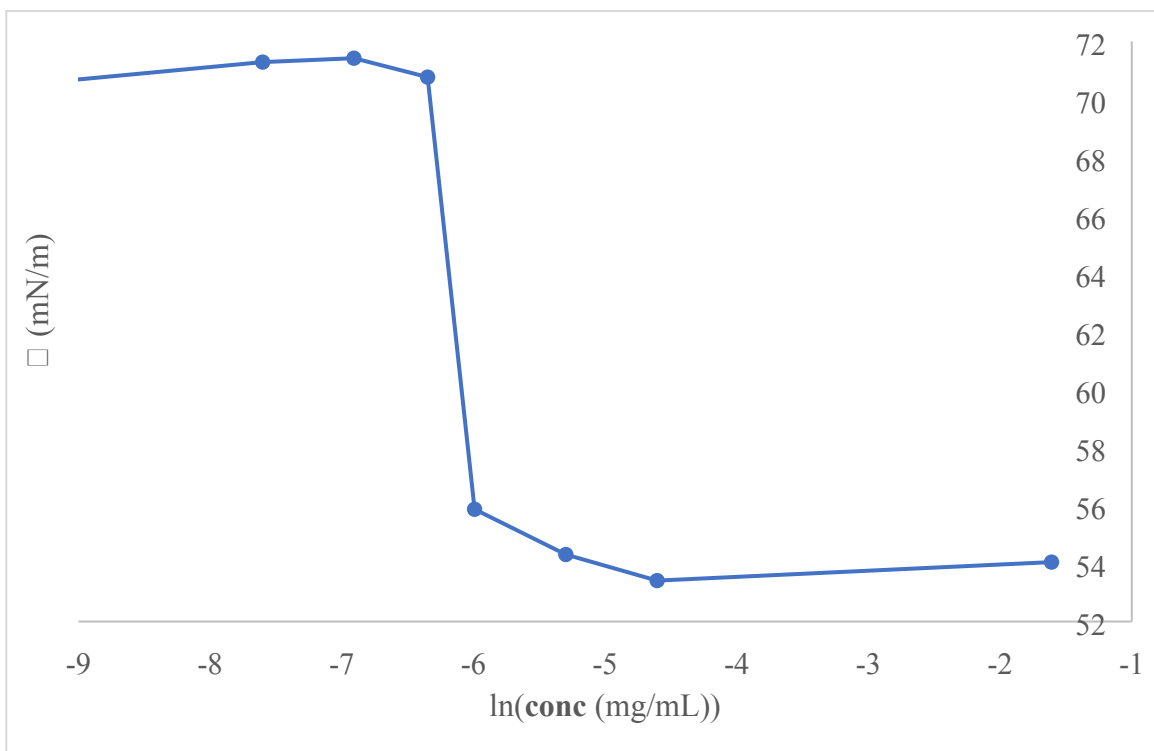

Figure S39: A plot of surface tension ( $\gamma$ , mN/m) vs. the natural log of concentration (mg/mL) for  $\text{SiO}_2$ -GPS-PCL-POEGMA-Br nanoparticles
